# Supplementary material for: Pancreatic Acinar Cells Employ miRNAs as Mediators of Intercellular Communication to Participate in the Regulation of Pancreatitis-Associated Macrophage Activation
Source: PubMed Central journal article supplement (PMC4980583; doi:10.1155/2016/6340457), 2016-07-28
Supplement: 6340457.f1.pdf [file 6340457.f1.pdf]

**Table S1 Oligonucleotide primer sets for real-time PCR**

| name           |   | Sequence(5'-3')           |
|----------------|---|---------------------------|
| TRAF6          | F | TCCCAGTTGGTTGTGAAGT       |
|                | R | GACCCAAGTTTCCGTGCC        |
| TAB1           | F | GACCCAAGTTTCCGTGCC        |
|                | R | ATAGCCATTGAAGACCC         |
| TAB2           | F | GAGACGGCTGCCCAAGT         |
|                | R | TCGCCTGCTCAGGTCTATC       |
| TAK1           | F | AAAGGCTTCCGCAGTTAG        |
|                | R | CGGTGGTGCTTGTTGATG        |
| NIK            | F | ACACTCGCTTGTTTGAGGA       |
|                | R | GGCTGTGCCTTTGGTGAT        |
| IKK            | F | TTCCAGCTGAGGAAAGTGTG      |
|                | R | TTCCAGCTGAGGAAAGTGTG      |
| $\beta$ -actin | F | GGAGATTACTGCCCTGGCTCCTAGC |
|                | R | GGCCGGACTCATCGTACTCCTGCTT |
| miR-128-3p     |   | UCACAGUGAACCGGUCUCUUU     |
| miR-15b-5p     |   | UAGCAGCACAUCAUGGUUUACA    |
| miR-679        |   | CAAGGUCUUCUCACAGUAGC      |
| miR-423-5p     |   | UGAGGGGCAGAGAGCGAGACUUUU  |
| miR-665        |   | ACCAGGAGGCUGAGGUCCCUUA    |
| miR-151-5p     |   | UCGAGGAGCUCACAGUCUAGU     |
| miR-761        |   | GCAGCAGGGUGAAACUGACACA    |
| miR-674-5p     |   | GCACUGAGAUGGGAGUGGUGUA    |
| miR-615        |   | GGGGGUCCCCGGUGCUCGGAUC    |
| miR-6328       |   | AGGCCUGCUCUGAGCCCCCGC     |
| miR-668        |   | UGUCACUCGGCUCGGCCCACUACC  |
| miR-3594-3p    |   | CCCAGGGCAGAGCAGUGUGAA     |
| miR-24-3p      |   | UGGCUCAGUUCAGCAGGAACAG    |
| miR-483-5p     |   | AAGACGGGAGAAGAGAAGGGAG    |
| miR-3573-5p    |   | UGAGGGGCAGUGAUAGAAAGGA    |
| miR-3541       |   | UCCCUCCCCUCACUGCA         |
| U6             |   | AAGGATGACACGCAAATTCG      |
